# Supplementary material
Source: PubMed Central journal article supplement (PMC6437758)
Supplement: NIHMS1012386-supplement-SI.pdf [file NIHMS1012386-supplement-SI.pdf]

**A sensitive, non-radioactive assay for Zn(II) uptake into metazoan cells**

Christopher E. R. Richardson, Elizabeth M. Nolan, Matthew D. Shoulders\*, Stephen J. Lippard\*

| <b>Page</b> | <b>Contents</b>                  |
|-------------|----------------------------------|
| S1          | Table of Contents                |
| S2–S3       | Extended Experimental Procedures |
| S4          | Supporting Tables                |
| S5–S8       | Supporting Figures               |
| S9–S11      | Vector Maps                      |

## I. Chemicals and Instrumentation

A. Chemicals and consumables: Phosphate buffered saline was purchased either as a 1× solution 21-040-CV) or a 10x concentrate (46-013-CM) from Corning. Tris (tris(hydroxymethyl)aminomethane) was purchased as a solid from Millipore Sigma (T1503, ≥ 99.5%). HEPES (4-(2-hydroxyethyl)-1-piperazineethanesulfonic acid) was purchased as a solid from Millipore Sigma (either RDD002 or H3375, both ≥ 99.5%). Sodium chloride was purchased as a solid from Millipore Sigma (S7653, ≥ 99.5%). Ammonium sulfate was purchased as a solid from Mallinckrodt (3512). Sodium hydroxide was purchased as a solid from Mallinckrodt (7708-06). Triton X-100 was purchased from Alfa Aesar (A16046). PMSF was purchased as a solid from Amresco (M145). TPEN (*N,N,N',N'*-tetrakis(2-pyridylmethyl)ethylenediamine) was purchased from Millipore Sigma (P4413-100MG) as a solid and dissolved in DMSO to a final concentration of 20 mM. Dulbecco's Modification of Eagle's Medium (DMEM) (15-017-CM) was purchased from Corning as a solution to which glutamine (Corning, 25-005-CI, 2 mM final concentration) and penicillin-streptomycin (Corning, 30-002-CI, 100 IU/L penicillin and 100 µg/mL streptomycin final concentration) were added. Fetal Bovine Serum (FBS) was purchased from Corning (35-010-CV). Nitric acid was purchased from Aristar Ultra as a concentrated solution (87003-226, 70%, ultra-high purity for quantitative trace metal analysis at the part per trillion level). ICP-MS environmental calibration standard was purchased from Agilent as a solution in 10% nitric acid (5183-4688). Amicon Ultra-15 molecular weight cutoff filters were purchased from Millipore (UFC901008). Pierce™ NHS-Activated Agarose, dry, was purchased from VWR (PI26196). <sup>70</sup>Zn(II)-gluconate was purchased as a solid from Millipore-Sigma (702595-CONF). Agilent ICP-MS Tb internal standard was purchased from Agilent (5190-8590, Tb as Tb<sub>4</sub>O<sub>7</sub> at 10,000 ppb in 2% HNO). ICP-MS Sample Tubes were purchased from VWR (97012-778). Sodium pyrithione was obtained as a solid from Sigma. Aqueous stock solutions were prepared from high-purity salts: CdCl<sub>2</sub> (99.999%; Aldrich), CoCl<sub>2</sub> (99.9%; Strem), CuCl<sub>2</sub>·2H<sub>2</sub>O (99.999+%; Aldrich), MnCl<sub>2</sub> (99.99% metals basis; Alfa Aesar), NiCl<sub>2</sub>·6H<sub>2</sub>O

(99.9999%; Aldrich), and  $\text{ZnCl}_2$  (99.99% metals basis; Alfa Aesar). pENTR233 vectors encoding ZIP4 (HsCD00370180), ZIP8 (HsCd00372914), and ZIP10 (HsCd00399932) were purchased from the PlasmidID Repository at Harvard Medical School. Vector sequences were confirmed by Sanger sequencing.

- B. Instrumentation: ICP-MS was performed on an Agilent 7900 ICP-MS in helium mode equipped with an integrated autosampler at the MIT CEHS core facility. The internal standard Tb was monitored.

**Table S1.** Primers used for gene amplification and qPCR.

| Gene       | Sense Primer                                      | Antisense Primer                                       |
|------------|---------------------------------------------------|--------------------------------------------------------|
| ZIP4       | 5'- AAAAAAGGTACCAA<br>ATGGCGTCCCTGGT -3'          | 5'- AAAAAATCTAGATTAGAAGG<br>TGATGTCATCCTCGTA -3'       |
| ZIP8       | 5'- AAAAAAGGTACCA<br>AATGGCCCCGGT -3'             | 5'- AAAAAACTCGAGTTACTC<br>CAATTCGATTTCTCCTGC -3'       |
| ZIP10      | 5'- AAAAAAGGTACCATGAAGG<br>TACATATGCACACAAAAT -3' | 5'- AAAAAACTCGAGTTAAAACT<br>GGATGTCAAACACAATTTTATC -3' |
| qPCR RPLP2 | 5'-CCATTCAGTCACTGATAACCTTG-3'                     | 5'-CGTCGCCTCCTACCTGCT-3'                               |
| qPCR MT1A  | 5'-TGGACCCCACTGCTCCTG-3'                          | 5'-CTTCTCTGATGCCCTTTGC-3'                              |
| qPCR ZIP4  | 5'-GTGTTCTGCCACGAGTTGCC-3'                        | 5'-CTCGCTCTCCTCGCTGACTC-3'                             |
| qPCR ZIP8  | 5'-GCAAGGCTTGTCGAGTGCTC-3'                        | 5'-ATTCATCGATGGCCTGGCG-3'                              |
| qPCR ZIP10 | 5'-GGCCAACAAGAATCCCCTCCT-3'                       | 5'-CCGTGGTGGTTATGTGCAGC-3'                             |

**Table S2.** Metal and Zn isotope concentrations (ppb) in a typical preparation of <sup>70</sup>Zn(II)-repleted DMEM/FBS. N.D indicates not detected.

| Metal Concentration / ppb |       |    |     |     |    |    |                  |                  |                  |                  |                  |      |
|---------------------------|-------|----|-----|-----|----|----|------------------|------------------|------------------|------------------|------------------|------|
| Mg                        | Ca    | Mn | Fe  | Co  | Ni | Cu | <sup>64</sup> Zn | <sup>66</sup> Zn | <sup>67</sup> Zn | <sup>68</sup> Zn | <sup>70</sup> Zn | Cd   |
| 19600                     | 68000 | 40 | 200 | 0.2 | 3  | 14 | 20               | 26               | 5                | 23               | 170              | N.D. |

## Supporting Figures:

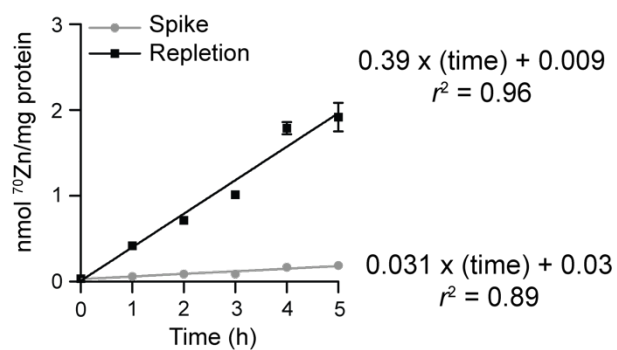

**Figure S1.** Comparison of  $^{70}\text{Zn}(\text{II})$  uptake from HEK293T cells cultured in DMEM/FBS spiked with 20 ppb  $^{70}\text{Zn}(\text{II})$  versus medium depleted of natural abundance Zn(II) then repleted with  $^{70}\text{Zn}(\text{II})$  (N = 3,  $\pm$ SEM). The latter protocol affords a > 10-fold improved signal.

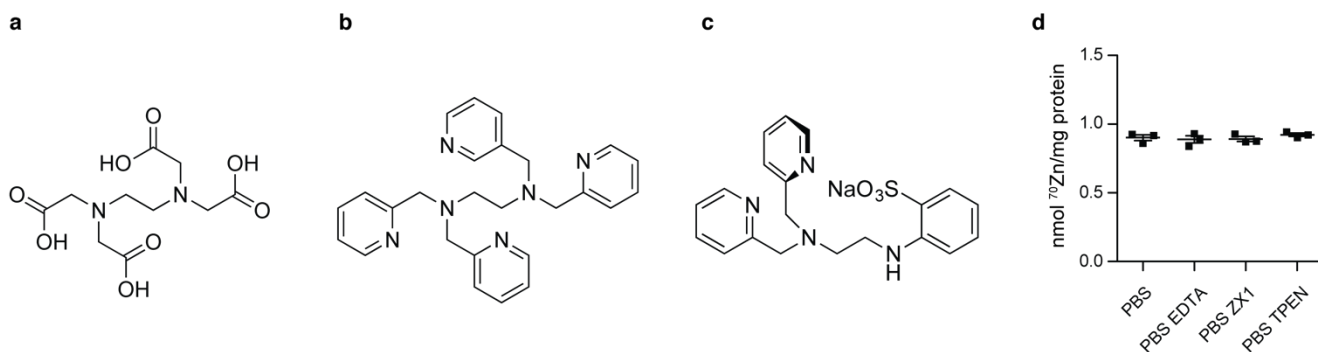

**Figure S2.** Structures of (a) EDTA, (b) TPEN, and (c) ZX1. (d) Cells washed with PBS containing 100  $\mu$ M of these chelators before harvesting do not have significantly different concentrations of cell-associated zinc ( $N = 3$ ,  $\pm$ SEM).

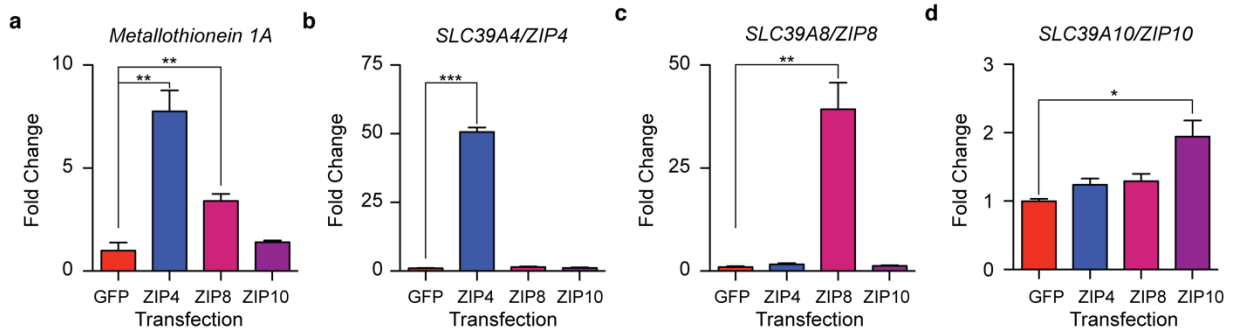

**Figure S3.** (a–d) qPCR analysis for transcripts for metallothionein 1A and ZIP family transporters (N = 3,  $\pm$ SEM). The gene name and protein name corresponding to the transcript analyzed in each panel is indicated above each plot.

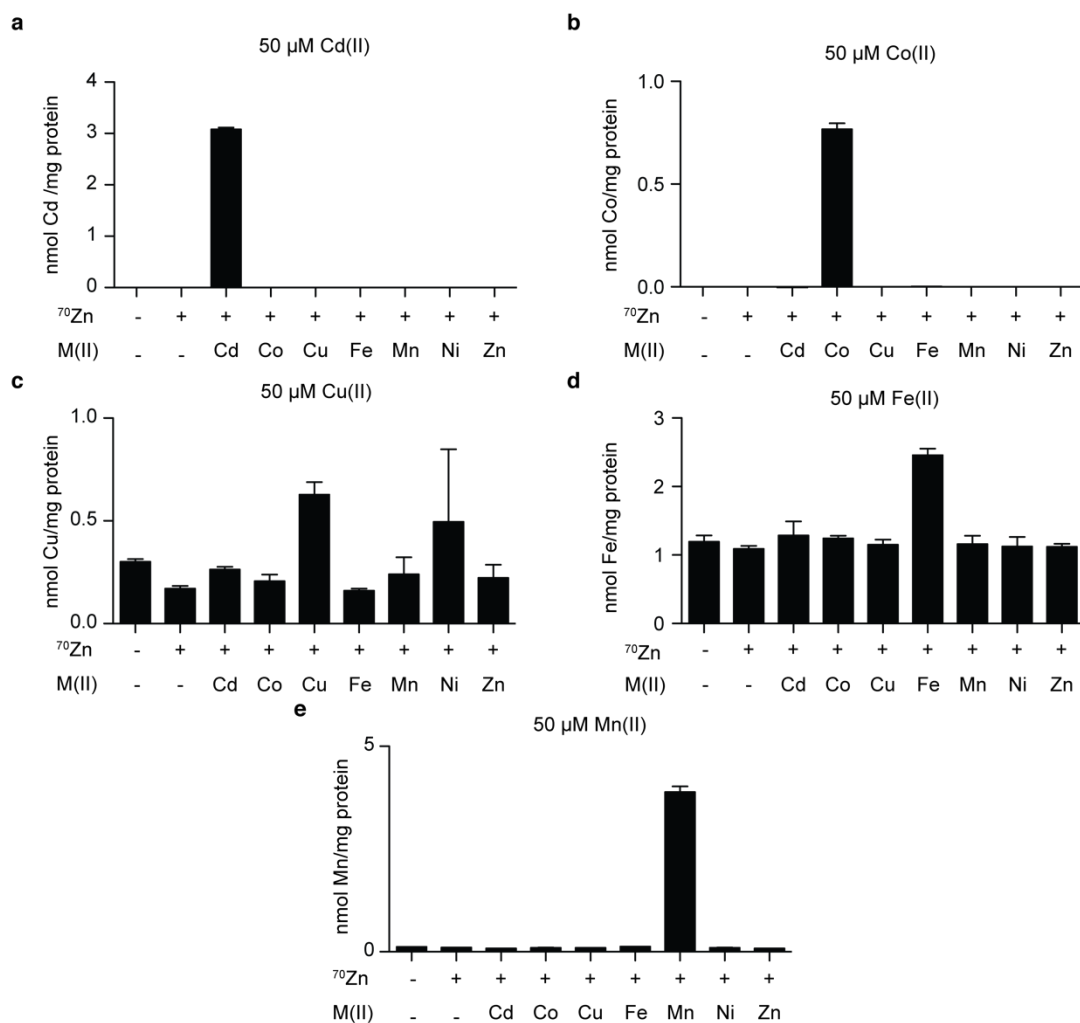

**Figure S4.** (a–e) Normalized cellular metal concentrations from HEK293T cells stimulated with 50  $\mu\text{M}$  of the indicated metal. Note there is no detectable Cd or Co in samples if cells are not treated with these metals.



Vector Maps:

ZIP4 in CMV Sport6

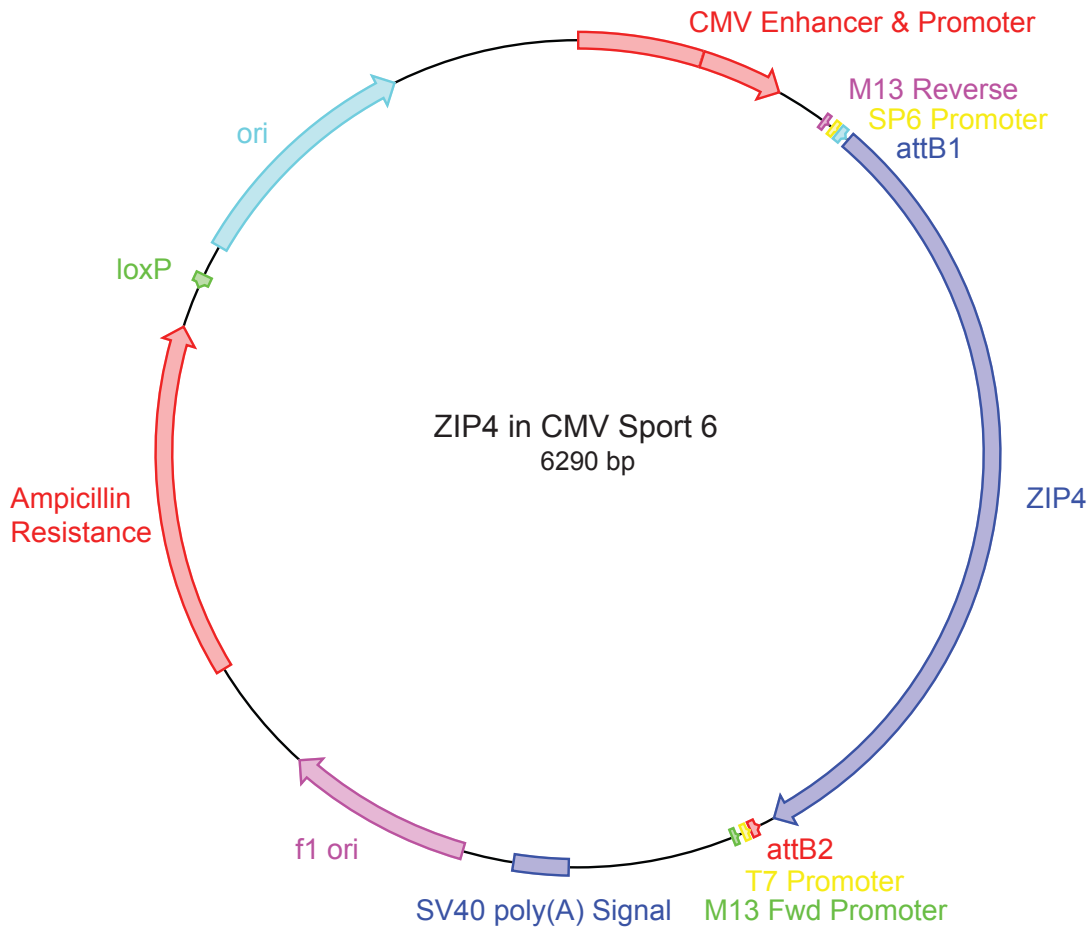

```
CGTTACATAACTACGGTAAATGGCCCGCTGGCTGACCGCCCAACGACCCCGCCCAATTGACGTCATAATGACGATGTTCCCATAGTAACGCCAATAGGGACTTTCCATTGACGTCATGGGTGGAGTATTACGGTAACTGCCCACTGG
CAGTACATCAAGTATCATATGCCAAGTACGCCCCCTATTGACGTCATGACGGTAAATGGCCCGCTGGCATTATGCCAGTACATGACCTTATGGGACTTCTACTTGGCAGTACATACGATATTAGTCATCGCTATTACCATGGTATGC
GGTTTTGGCAGTACATCAATGGCGTGGATAGCGGTTTTGACTCACGGGATTTCCAAAGTCCACCCCAATTGACGTCATGGGAGTTTTTTTGGCACAAAATCAACGGGACTTTCCAAAATGTCGTAACAACTCCGCCCAATTGACGCAATG
GGCGGTAGCGGTGACGGTGGGAGGCTCTAATAAGCAAGCTCGTTTATGTAACCGTCAGATCGCCTGGAGAGCCATCCACGCTGTTTGACTCCATAGAAAGACCCGGGACCGATCCAGCCTCCGGACTTAGCTTAGCCCGGGAGCG
GATAACAATTTACACAGGAAACGCTATGACCATTAGCCCTATTAGGTGACACATAGAAACAAGTTTGACAAAAGACAGCGCTGTACCATGGCGTCCCTGGTCTCGTGGAGCTGGGGCTCTTCTGGCTGTGGTGTGACGGCCAC
GGCGTCCCGCCTGCTGCTGCTGAGCCTGCTCACTCTGGCCAGGGGCTCTGGATCAAGAGGCTCTGGCCGGCTGTTAAATACGCTGGCGGACCGTGTGCACTGCACCAACGGCCGCTGTGAAAAGTGCCTGTCTGGAGGACCGC
CTGGCCCTGGCGAGCCTGAGGGTCAAGGCTGCCCCGGGCCGCTCTGGAGGCCAGGTACCTGCCCGCCTAGTCCCGCCGGCTCTGACCTAGCAACCCGAGGGCACCTGTGAGGACACTCGGGCTGGCCCTGGGCCCT
CATGACAGCCACTCTGCCCTGCTCGAGAGCCCAAGGCCGACCCGGGCGTGGCTGGCTGTCGACAGGATGACGGCCGGGCTGCCGGCCAGCCCAAGACGGCCTGCTGATATCCCTCAGCTGCTGGAGGAGGGGCTG
GGGGCGGGGCTCCGGGCACTGCTGGCGGCTCTGGCTGCCCTGCTGGACATGTCAAGGAGCGGCTTCTGCTCCACCGCTTGGCGAGCCCTCAGTACTCTGTGGACTTTGTGTTCCAGCAGCACAGCAGGAGTCCCTATGACGCTGG
CCGAGCTGTACGCTTGTATGACAGCCCTGGGGTGGCCAGGAGGCCACAGTACCCAGCATGTCCGACAGGGGACCCAGCAGCCGGGACCTGTGCCCTCATCAGCTCCAGCAACAGCTCCAGTGTGGGACACGGTATGCTGAG
TGCCAGGGACGTGATGGCTGCATAGCTGTGGAAACAGCTGGGGTACCCCGGAGCCCTGGGCCAAGCTGAGCCCTGCCCTGCTCCAACAGCAGCTGAGTGGAGCCCTGCACCTCCAGTCCAGGCCCCCGCTCCAGGACCCAGCTCAGC
CAGTCAGAGAGTATCTGACGCTCCCTGGCCAGCCTGCTCATCTGCTCTGCGCGCTTTGGCCCTGCTGCTGACCTGCGCTGGCTGACAGGGGGTCAACCCACTACATCTCTGAGACTTCTGAGCTGGCAGTGGGCTGCACACT
GGGAGCCTGTCTGCTGATCAGCCAAAGTGTCTGGGGCTGCATACACACAGCAAGAGGCTCCAGCCACAGCCACCTGGCCCTCTGGCTATGCTGGCCGGCTTACCCCTTCTCTGTTTGAAGAACCTTCAATCTCTGCTG
CCAGGGACCGGAGGACTGGAGGAGCGGCTCGGGCCACAGCAGCATAAGCCAGGGGCCACAGCCAGGCTGTCTCCCTGCACTGGCAGCCAGGAGCTCCGGCAGCCAAAGCCCGCCAGGCTCCCGCCAGCAGCTGGT
GGCGGAGGAGCCGGAGCTGCTGAACCTGAGCCAGGAGACTGAGCCAGAGTTGAGGCTACTGCCCTATATGATCACTGTGGCGCCGCTGCACAACTTCCGGCAGGCTGGCCGTGGCCGCTCCGCTCTCTCGTGAAG
ACCGGCTGGCCACTCTGCTGGCCGTGTTCTGCCACGATTTGCCACAGAGCTGGGGGACTTCCCGCCTTGTCTGACAGCGGGGCTGTCCGTGGCCCAAGCACTGCTGCTGAACACTGGCCCTCCGGCTCCAGCCCTCCGCTGGTCTCACG
TGGCACTGGCGTGGAGTCAAGGAGGAGGAGGAGGCTGGATCTGGCAGTGGCCACCGCCGCTTCCCTCAGTACGACTGCGACATGCTCCGGGATGTTGAAAGTACGGGACCCGGCCCTGGCTCTCTCTGCTGCACAAC
GTGGGCTCTGGGGGCTGGACCGTCCGCTGCTGCTGCTGCTGTACAGGAGTACACATCACCTTAACTCTAGAGTATCCCTGAGGGGCCAAAGCTTACCGGTACCCAGCTTTCTTGTACAAAATGGTCCCTATAGTAGCTGATTATAAG
CTAGGCACTGGCCCTGCTTTTACACGCTGCTGACTGGAAAAGTCTGACTGGGATCTTTGGAAGGAACCTTACTTCTGGTGTGACATAATTGACAAAATACCTACAGAGATTTAAAGCTCAAGGTAATATAAAATTTTAAAGTGATAAT
GTGTTAACTAGCTGCATATGCTGCTGCTGGAGATTTGCTTACTGAGTATGATTTATGAAAATATATACAGAGGAGTGTGATTTAAATGTTTGTGATTTTATGATTACAGCTCCCAAGGCTATTGAGGCCCTCAGCTCCACAGTCTGT
TCATGATCATAATCAGCCATACCATTTTGTAGAGTTTTACTGCTTTAAAAAAGCTCCACACCTCCCGCTGAACTGAAACATAAAATGAATGCAATTTGTTGTTAACTGTTTATGCAAGCTTAAATGGTACAAAATAAGCAATAGGATCA
CAAAATTTCAAAAATAAGCATTTTTTCACTGCATTTAGTGTGGTTTTGCCAACTCATCAATGATCTTATATCATGCTGGATCGATCTGCAATTAATGAATCGCCAACGCGGGGAGAGGCGTTTTGGCTATGGCTGGCCTAATAGGCAAG
AGGCCCGACCGCTCGCCCTTCCCAACAGTTGCGCAGCCTGAATGGCAGTGGGAGCGCCCTGTAGCGCGGCTTAAAGCGCGGGGTGTGGTGGTACGCGCAGCTGACCGCTACACTTGCACGCGCCCTAGCCCGCCTCTTTCGCG
TTTTCTGGCTTCTTCTCGCCAGTTCGCGGCTTTCCCGATCAAGCTTAAAGTGGGCTCCCTTTAGGGTTAGGCTTTAGGCTTTACGGCACTCGACCCCAAAAATTTGATTAGGTTGATGGTTCACGATAGTGGCCATAGTGGCCATGATA
GACGGTTTTTCCGCTTTGACGTTGGAGTCCAGCTTCTTAAATGTTGACTTGTTCAAAATGGAACACACTCAACCTATCTCGGCTTATCTTTTATTAAAGGAAATTTGGCGATTGGCCCTATTGGTAAAAAATGAGCTGATTTAA
AAAAATTTAAGCGCAATTTAAACAAAATTAACAGTTTAACTTTCAAGTGGCCACTTTTCCGGGAAATGTGGCCGGAACCCCTATTTGTTTATTTTCTAAATACATTTCAAATATGATCCGCTATGGCAGGCTTGGAGTGGAGAACGGCTTGC
TCGGCAGCTTCGATGTGTGCTGGAGGGGAAATAAGGTTAAGATGTGGCATAGAGGAAAGTCCGATTTGAATATGCTGTGATGGGATCGCTGGTATCAAAATGTTGTCGCCACCCCTGGCATGAGACAATAACCTGATAAATGCTCAATA
ATATTGAAAAGGAAGATGATGATTTCAACATTTCCGTTGCGCCCTTATCCCTTTTTTGGCGCATTTGGCTTCTGTTTTGCTCACCCAGAAACCGCTGGTGAAGTAAAGATGCTGAAGATCAGTTGGGTGCAACGAGTGGTGTACATCGAA
CTGGATCTCAACAGCGTAAAGTCTTGGAGTTTTTCCCGCCAGAAACGTTTTCAATGATGAGCATTTTAAAGTTCTGCTATGTGGCGGGTATTATCCCGTATTGACCGCGGCAAGAGCACTCGGTCCCGCATACACTATTCTCAGAAT
GACTTGGTTGAGTACTCACCAGTCAAGAAAAGCATCTTACGGATGGCATGACAGTAAAGAAATTTATGAGTGTGCTGCCATAACCATGAGTGTAACTCGCGCCAACTTACTTCTGACAAACGATCGGAGGACCGAAAGGACTAACCGCTTTTT
GCACAACATGGGGCATGTAACCTGCTTATGCTTGGGAAACCGGAGCTGAATGAAGCCATACCAACAGCAGGCGTGCACCCAGCATGCTGTGCAATGGCAACCACTGGCCAAACTTAACTGGGGAACACTTACTTACTAGCTTCC
CGGCAACAATTAATAGACTGGATGGAGGCGGATAAAGTTGCAAGGACCACTTCTGCGCTCGGCCCTCCGGCTGGCTGTTTATGCTGATAAATCTGGAGCCGTTGAGCGTGGGCTTCGGGCTTACATTGCAAGCACTGGGGCCAGATGGTAA
CCCTCCCGTATCGTAGTTATCTACACAGCGGGGACTCAGGCAACTTGGATGAACGAAATAGACAGATCGCTGAGATAGTGGCTCACTGATTAAGCTTGGTAACTGTGACAGCAAGTTTACTCATATATCTTTAGTGTGATTTAAACCTTCA
TTTAAATTTAAAAGGATCTAGGTGAAGATCCTTTTGAATATCTGATCCATAAAGCTTCGTAATGATGATGCTATACAGAGTTATGGCATGACCAAAAATCTTCCACTGAGATTTTCCGTTCACTGAGGTTTCCGTTCACTGAGGCTGCAAGCCCGT
TCTTTGAGATCCTTTTTTCTGCGGTAATCTGCTGCTGCAAAAACAAAACCCCGCTACAGCCGGTGGTTTTGTTCCGGATCAAGAGCTCAACACTTTTTTCCGAAAGTGAAGCTGGCTTCCGAGGAGCGGAGATACCAAAATCTGTCTTCTG
GTAGCGCTGATAGGCCACCTTCAAGAACTCTGTAGCAGCCGCTACATACCTCGCTCTGCTAATCCTGTTTACAGTGTGGCTGCTCCAGTGGCGATAGTGTGCTTACCGGTTGACTCAAGACGATAGTACCGGATAGGCGGACGG
GTCCGCTCAAGCGGCTTCCGCAACAGCTTGGAGCGCAACCCACTACACGAACTGAGATATCTACAGCTGAGCATTGGAAGAAAGCGCCACGCTTCCGAGAGGAGAAAGCGGCAAGGATCTCGGTAAGCGGACGCTGAGGCTGCGA
ACAGGAGCGCAGGAGGACTTCCAGGGGAAACCGCTGATCTTTTACTGCTGTCCGCTTCCGACCTTGACTTGGAGCTGATTTGATGCTGCTGCTCAGGGGGGAGCTATGAAAACCGCCAGCAGCGCTTTTTA
CGTTTTCCGCTTGGCTTCTGGCTTCTGCTACATGTTCTTCTGCTTATCCGCTTCTGGATACCGTATACCGCTTTGAGTGAAGTATCCGCTCCGCGCAGCCAGCCAGGAGCAGTCACTGAGTGGAGGAGCGG
AAGAGCGCCAAATACCAACCCGCTTCCCGCGGCTGGCGGATTCATTAATGACAGCTTGCATTTCCGCGTTTTTCAATATTATGAGCATTTACAGGTTTATGCTCATGAGCGGATACATATTGAATGATTTAGAAAAATAACA
AATAGGGTTCCGCGCACTTTCCCGAAAAGTGCACCTGACGCTTAAAGAAACCATTTATCATGACATTAACCTATAAAAATAGCGGTAGTACAGGCCCTTCACTCATTAGATGATG
```

ZIP8  
Sport6

in CMV

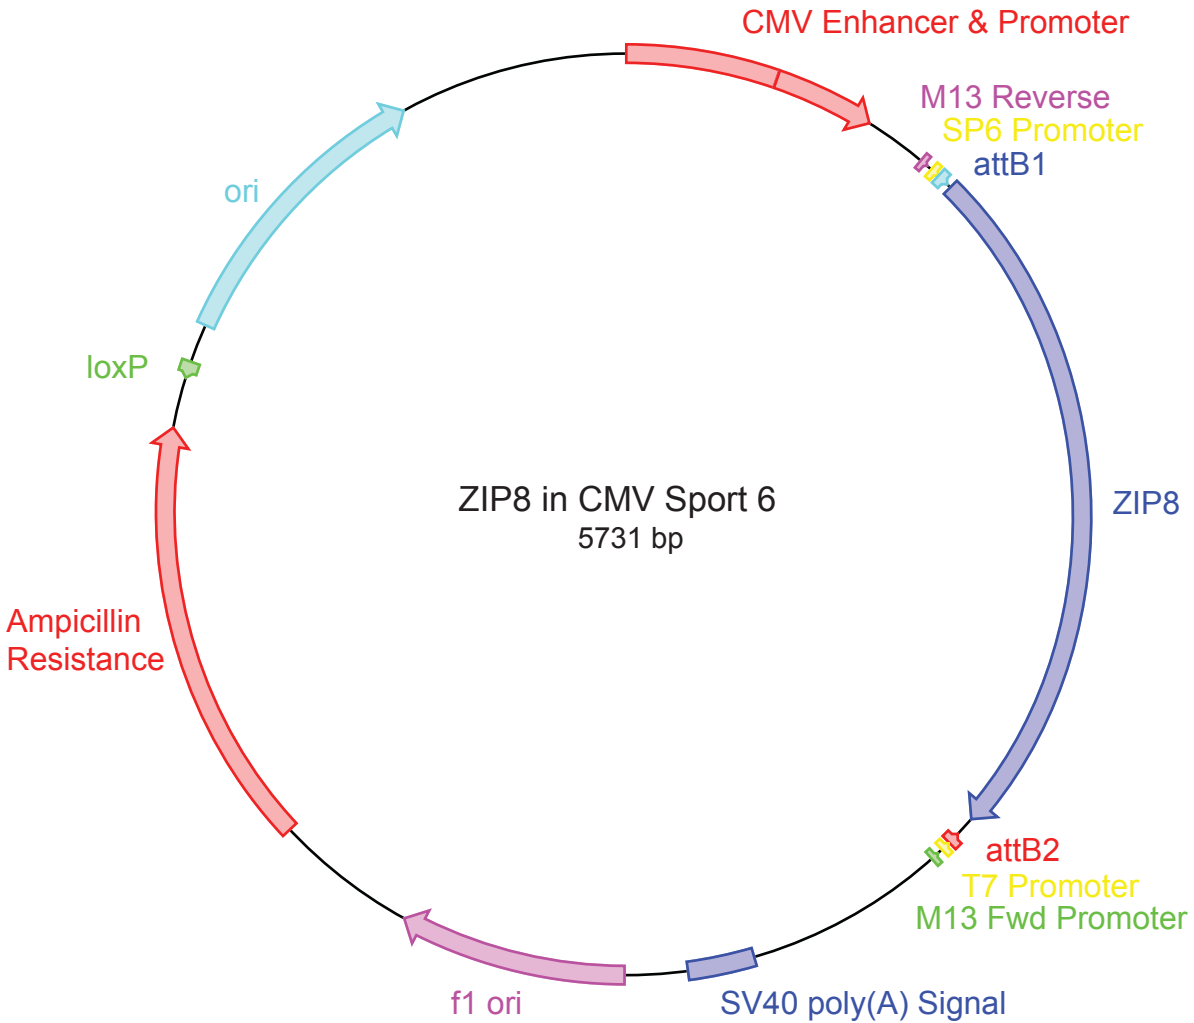

CGTTACATAACTACGGTAAATGGCCCGCCTGGCTGACCCGCCAACGACCCCGGCCATTGACGTCAATAATGACGTATGTTCCCATAGTAAACGCCAATAGGGACTTCCATTGACGTCAATGGTGGAGTATTACGGTAAACTGCCCACTGG  
 CAGTACATCAAGTGTATCATATGCCAAGTACGCCCCCTATTGACGTCAATGACGGTAAATGGCCCGCCTGGCATTATGCCAGTACATGACCTTATGGGACTTTCCTACTTGGCAGTACATCTACGTATTAGTCATCGCTATTACCATGGTATGC  
 GGTTTTGGCGAGTACATCAATGGCCGTGGATAGCGGTTTGGACTCAGCGGGGATTTCCAAAGTCTCCACCCCATTTGACGTCAATGGGAGTGTGTTTTGGCCACAAAATCAACGGGACTTTCGAAATGTCGTAAGCACTCGGCCCATTTGACGGAATG  
 GCGGTAGCGCTGTACGGTGGGAGTCTATAAGCAGAGCTCGTTTATGTAACCGTCAAGATCGCCTGGAGACGCCATCCACGCTGTTTTGACCTCCATAGAAAGACCCGGACCGATCCAGCCTCGGACTCTAGCCTAGCCGAGG  
 GATAACAATTTCCACAGGAACAGCTATGACCATTAAGCCCTATTAGGTGACACTATGAAACAAGTTTGTACAAAAAAGCAGCTGTACCAAAATGGCCCGGGTCCGCGGGTGGCCGGCTGTGTTCTGGCGGCCCGCCCTCGGAGG  
 AGTGGCGGAGGGCCAGGGCTAGCCTACGCGAGGATGTGCTGAGCGTGTCCGCGCGAATCTGAGCCTGTCCGCGGCCAGCTCCAGCCTTCTGAGCAGATGGGAGCCGCTCCCGCTGGCGCTCCCGGAGCTGGCCAGCTGCA  
 CTTCAACCAGTGTAACTGCTGAAGAGATCTTCCCTTCATGGCTTTCAAAATGCTACCCAAATAACCAAGCTCAAAATCTCTGTCATCTGTCCAGCAGCTTACAGCAATGAACITTCACCACTGAGGAGTCCGCCAAGCACAACAAGA  
 CCAAGTCATTGAGAAGTTGGGGATATGGATTCCTGTCAGTGCAGTATTAATATCGGCATCTCCCTCGGATGATTTGACTCCACTGATAAAGAAATCTTATTCGCAAGATTTGACCTTTTTTGGGGCTGGCTATGGGACTTTTTTCA  
 AATGCAATTTTCCAACITTAATCCAGAGGCAITTTGATTTGATCCCAAAGTCGACAGTATGTTGAGAAGGCAITGGCTGTGTTTTGGTGGATTTTACCTACTTTTTCTTTTGAAGAATGCTAAAGATTTAAAGACATATGGTCAGAATGGTCA  
 ACCCACTTTGGAAATGATAACTTTGGTCCCTCAAGAAAAAATCATCAACCTAAAGCATACCTGCCATCAATGGTGTGACATGCTATGCAAAATCCTGCTGTCACAGAAAGCTAAATGGACATATCCATTTGATAATGTCAGTGTGGTATCTTACAGGA  
 TGGAAAAAAGAGCCAAAGTTCATGTACCTGTTTGAAGGGCCCAAACCTGTCAGAAATAGGGAGCATTGCTGGATGATAACGCTGTCGAGATGCCCTCCCAAAATTCATCGATGGCTGGCGATTGGGGCTTCTGCACCTGTCTCCCTCAGG  
 GACTCAGTACTCCATAGCAATCCTATGTGAGGAGTTCACACAGAGTATGAGGATCTTGTGATCCTACTCAATGCAAGGATGAGCAGCTGACAAAGCCTGCTTCAACCTCCTTTCTGATGTTCTCCTGATGTTGGGCTAGCTTTGGCATT  
 GGTGGGCAACAATTTCCGCTCCAAATATTAATTTGCACTTGTGGAGCATGTTCTCTATAATTTCTCTGGCAGATATGTTCCAGAGATGAATGATATGCTGAGAGAAAAAGTAACTGGAAGAAAAACCGATTTACCTCTTCTCATGATTAGA  
 CTGGAAATGTAACCTGATTCACAGCTTCTACTATTACCTGTATGTCAGGAGAAATCGAATGGAAGTAACTAGAGATATCCCTCGAGGGGCCAAGCTTACGCGTACCAGCTTCTTGTACAAAAGTGGTCCCTATAGTGAGCTATTATAAG  
 CTAGGCACTGGCCGCTGTTTTACAACGTCGTGAACCTGGGAAAACTGACTGGGATCTTTGTAAGGAACCTTTACTCTGTGGTGTGACATAAATGGACAAACTACACAGAGATTTAAAGCTCAAGGTAATAAGTTTAAAGTATAAAT  
 GTGTTAACTAGCTCATATGCTGCTGCTGAGAGTTTGTCTACTGAGTATGATTTAAGAAATATATACACAGGAGCTAGTGAATCTAATGTTTGTGATTTTATAGATTCACAGTCCCAAGGCTCATTACGGCCCTCAGTCTCACAGTCTGT  
 TCATGATCATAAATCAGCCATACCACTTTGTAGAGTTTTACTTGTCTTAAAAAACCCTCCACACCTCCCCCTGAACCTGAAACATAAAATGAATGCAATTTGTTGTTAACTTTTATGCACTATAAATGGTTACAAAATAAGCAATAGCATCA  
 CAAATTTCAACAATAAAGCAATTTTTCACTGCATTCAGTGTGGTTTTGCCAACTCAATGATCTTATCATGCTGGATCGATCCTGCAATTAATGAATCGGCCAACCGCGGGGAGAGCGGGTTTTGCGTATTTGGCTGGCGTAATAGCGAAG  
 AGGCCCGCACCGATCGCCCTTCCCAACAGTTGCGCAGCCTGAATGGCGAATGGGACGCGCCCTGTAGCGCGCATTAAAGCGCGCGGGTGTGGTGGTTACGCGCAGCGTACCCCTACTTGGCCAGCGCCCTAGCCCGCCTCCTTTGCG  
 TTTCTCCCTCCTTCTCGCCACGTTCCGCGGCTTCCCGTCAAGCTCTAAATCGGGGGCTCCCTTAAAGGTTCCGATTTAGTGGCTTACCGCACCTCGACCCCAAAAAAATGATAGGGTGAAGTTCACGTAGTGGGCCATCGCCCTGATA  
 GACGGTTTTTCGCGCTTGTACGTTGGAGTCCAGCTTCTTAATAGTGGACTTGTTCGCAAACTGGAACAACACTCAACCCATCTCGGCTTACTTTTTGATTATAAGGGATTTTGGCGATTTCGGCTATTGGTTAAAAAATGAGCTGATTTAAC  
 AAAAATTTAACGCGAATTTTAAACAAAATAAAGCTTTTACAATTTCAAGTGGCACTTTTCCGGGAAATGTGGCGGAAACCCCTATTGTTTTTCTAAATACATCAAAATATGATCCGCTATCGCCAGCTTGGACTGGTGAAGCGGCTTGC  
 TCGGACGCTCGATGTGTGCTGGAGGGGAGAAATAAGGTTTAAAGTGTGCGATAGAGGAAAGTCCGATTTGAATATGCTGTGTAGGGATCGCTGGTATCAAAATGCTGTGCCCCCTGGCATGAGACAATAACCCCTGATAAATGCTTCAATA  
 ATATTGAAAAGGAGAGATAGATGATTTCAACATTTCCGTTGCTGCCCTTATCCCTTTTTTCCGGGATTTTGGCTTCTGTTTTGCTCACCCAGAAACCGTGGTGAAGATAAAGATGCTGAAGATCAGTTGGGTGACAGAGTGGGTATCTCGAA  
 CTGGATCTCAACAGCGGTAAGATCCTTGAAGAGTTTTCCGCCCGAAGAACGTTTTTCCAAATGATGAGCAGCTTTTAAAGTCTGCTATGTGGCCGGTATATCCCGTATTGACCGCGGCAAGCACTCGCTCCGCCATACGATTTCTCAGAAT  
 GACTTGGTTGAGTACTCCAGGTCACAGAAAAGCATCTTACGGATGGCATGACAGTAAGAGAAATATGCAAGTGTGCTGCATTAACCATGAGTGATGAACACTGCGGCCAATCTACTTCTGACAACGATCGGAGGACGAAAGAGCTAACCGCTTTT  
 GCACAACATGGGGTACTGTACTCGCTTGTATGCTTGGGAACCGGAGCTGAATGAAAGCAATACCAAAACGACGAGCGTGCACCCAGATGCTGTAGCAATGGCAACAACGTGGCCAACTATTAACCTGGCGAACTACTTACTTAGCTTCC  
 CGGCAACAATTAATAGACTGATGAGCGGATAAAGTTGCAAGACACTTCTCGCTCGCCCTTCCCGCTGGCTGTTTTTCTGATAAATCTGGACCGGTGAGCGGTGCTCTCGCTCGCTATCAATTGACAGCACTGGGCCAGTATGATAAG  
 CCCTCCCGTATCGTACTTCTACAGCAGCGGAGCTCAGGCAACTATGAGTAAAGCAATAGACAGATCGCTGAGATAGTGCCTCAGGATTAAGCATTTGAGCACTGTCAGACAGCAAGTTACTCATATACTTACTTAACTTCAAT  
 TTTAATTTAAAGGATAGTGAAGATCCTTTGATACTCTAGCCTAACCTCTGATAATGATGCTACAGAGTATGGCATGACAAAATCCCTAACCTGAGTTTTCTGCTCACTGAGCTGAGCCGAGCCGATGAAAAGATCAAAGACTCT  
 TCTTGAGATCCTTTTTCTCGCGGTAATCTGCTGCTTGCAAAACAAAACCCAGCCTACCAAGCGTGGTTTTGTTCCGGCATCAAGAGCTACCACTTTTTCCGAAGGATCACTGGCTCAGCAGGCGGATACCAAACTGCTCTCTAG  
 TGTAGCCGTAATGAGCCACCACTTCAAGAACTCTGTAGCCCGCCTACATACCTCCTCTGCTAATCTCTGTACCAGTGGCTGCGCAGTGGCGATAAGTCTGCTTACCGGTTGAACTCAAGAGATAGTTACCGGATAAGGCCAGCG  
 GTCGGCTGACAGGGGGTTCGTCACACAGCCAGCTGTGAGCGAAGCACTCACGCAACTGAGATACCTACAGCTGAGCATTGAGAAGGCGCCACGCTCCCGAAGGGAGAAAGCGGACAGGATCCGGTAAGCGCGGAGGCTCGGA  
 ACAGGAGCGCCACGAGGGAGCTTCCAGGGGAAACGCTGATCTTTATAGCTGCTGGGTTTTCCGCACTTACAGCTTGAAGCTGATTTTGTGATGCTGTCAGGGGGGGAGGCTATGAAAACCGCCAGCAACCGGAGCTTTTA  
 CGGTTCTGGCTTTTGTGGCTTTTGTCTACATGTTCTTCTGCTGATCTCCCTGATTCTGTGGATACCGGATTTACCGGCTTTAGTGGAGCTGATACCGCTGCGCCAGCGCAAGCAGCCAGGCGAGGAGCTGAGTGGCGGAAAGCGG  
 AAGAGCGCCCAATACGCAAAACCCCTCTCCCGCCGCTTGGCCGATTCTAATGACAGAGCTTGCAATTCGCGGTTTTCAATATTAATGAAGCTTATACAGGTTATTGCTCACTGAGCGGATACATATTGAAATGTTTGAAGAAATAACA  
 AATAGGGGTTCCGCGCATTTCGCCGAAAGTGCACCTGACGCTAAGAAACCATTTATTCATGACATTAACCTATAAAAAATAGCGGTAGTACGAGGCCCTTCACTCATGATGATGAT

ZIP10 in CMV Sport6

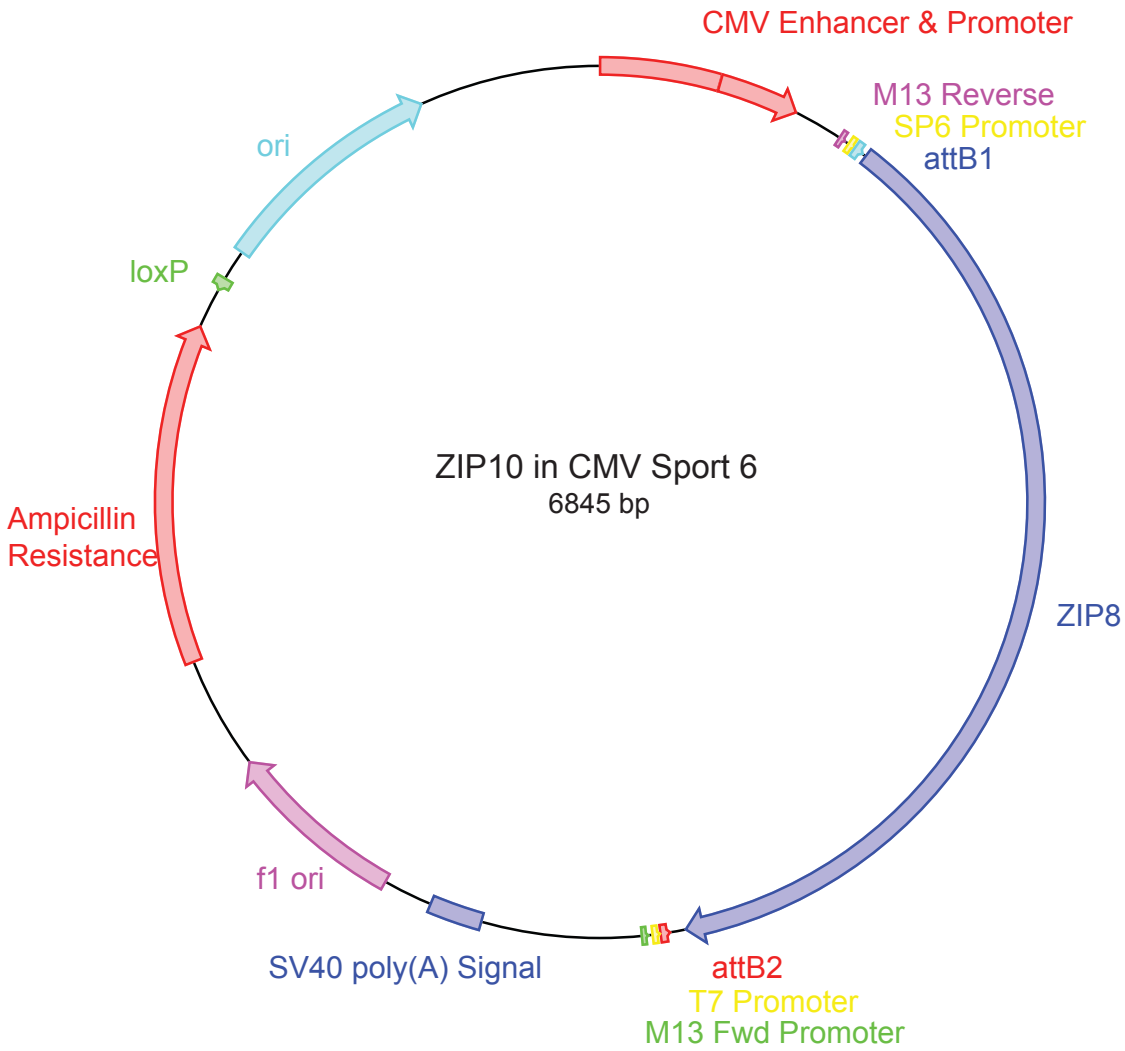

CGTTACATAAAGTACGGTAAATGGCCCGCTGGCTGACCGCCCAACGACCCCGGCCATTGACGTCAATAATGACGTATGTTCCCATAGTAAACGCCAATAGGGACTTCCATTGACGTCAATGGGTGGAGTATTACGGTAAAGTCCCACTGG  
 CAGTACATCAAGTGTATCATATGCCAAGTACGCCCTATTGACGTCAATGACGGTAAATGGCCCGCTGGCATTATGCCAGTACATGACCTTATGGGACTTCTACTTGGCAGTACATCAGCTATTAGTCAATCGCTATTACCATGGTATGC  
 GGTTTGGCGAGTACATCAATGGCCGTGGATAGCGGTTTGGCTCAGCGGGGATTCCAAAGTCTCCACCCCATTTGACGTCAATGGGAGTTTGGTTTGGCCACAAAATCAACGGGACTTTCGAAAATGTCTGAACTCGGCCCAATG  
 GCGGTAGCGCTGTACCGGTGGAGGTCTATATAAGCAGAGCTGTTTAGTGAACCGTCAAGATGCGCTGGAGAGGCCATCCACGCTGTTTGGCCTCATAGAAGACACCGGACCGATCCAGCCTCGAGCTTAGGCTAGGCCCGGAGCG  
 GATAACAATTTACACAGGAAACAGCTTAGCCATAGGCCTATTAGGTGACACTATAGAACAAGTTTGTACAAAAAAGCGAGCTGTACCAAAAAGAGTACATATGACACAAAAATTTGGCCCTATTGTTTGGTGAACATTTATTTTCATCAT  
 GCAACATTGGCATGAAGACATGACATGGCCCTGAAGCGCTCACAGACAGCATGTTGAAATGACAGAAATGGAGCAAGCAAAATTTCAAAAGCAAGCTGAAATGAAAATACTATTGAAAACATTTTGGAGCTTATGGTGAA  
 ATGGGAATTAATCTTTTTTTGGAGAAACTTTTAAACAACTGGGCCCTTGGAGAGAGAAAAGTGTGAGATTAACTCATGAGGATCTGGCCACAGATCATGTTTCTCATTTTAGATTTTGGAGCTTCAAGAGGAAAGCAATTTTCCATCACAT  
 AACCCACAGCATCCCATTAATCAATTAATAGAAAATCAAACTGTGACACAGTGTATCCAAAAAGAAACATAAATGTGATCCAGAAAGAGACAGTGAAGTGTCTGTAATCTGATGATAAACATATGATGACCATATCACCCGCTACG  
 TCATCACCATCGTTTGCATCATCTCTGATCATATAACAACTCACCATTTTCAATAAATGATTCATCTCCAGTGGAGCTGGGGAGCCATGACATGAACCTTCAACAGAGACCAATAAAACCAGGAAACAACTGTATGTTAAAGTACCGAAAGGA  
 AAGAGGAAAGAAAAGGGAGGAAAGTAAAGAAAATCTGAGGTTTATCACACAGGTTTCCCCCTAACCATGATCAGGGTGAACAGTATGAGCATATCGGGTCCCAAAACCTGATCGTGTACATAACCCAGGTCATTCATGTACATCTTCCA  
 GAACGTAATGGTCAATGATCCGCTGGGACCAAGATCTTGTCTGATAATGAAGTGAACCTTGCACACTACTAGAAGAGAGAAAGCACCACATGTTAAAAAATGCAATATTTCTTTGAGAAAAGTCAAAATGAAGATGACCATCATG  
 AATGTTGAAGCTCACTCAGTTATAAAATACTATGGTCAATGGTCCCACTCTCCATCTCACTGATTTATTTACATACCTTTGGCCCTGGCTTTTATATCAAATCGACAGCAGACTTTGATTTAGCATTTTGACAAAATTTAGTTGAAGATATAAA  
 TAAGGATAAAAACTGGTTCTGAAGATGAGGCAAAATAGGGGCATCAGCCTGGATTTTGGTATCATCTCATACTGTCATAGCCTGTTTCCCTGCTGATCATTAAACCAAGGATGCTTCAAATTCCTTCTTACAT  
 TCCTTTGGTCACTAGCTGATGAGCAATGAGTGGAGACGCCCTTCTTCACTACTGCCCATTTCTCAGGGTGGACATGATCAGACTCACCACATGACATGGGCATGGACATTTCTCATGGACATGAACTAACAAGTTTGGAAAGATATGATG  
 CTGATTTGAAAGACATGTTGGCTTAGGAGGCTTACTTGGCTATTATCATTTGAACACTGCATTAGAATGTTTAAAGCACTAACAACAAAGAGGAAACAGAAAATGGTTTTATGAACAGAGAACACAGAAAGATCAACTATTGAAAGAAAGCTTCA  
 GATCACAAGTAAACAAATACCCAGATTCGACTGGCTTCAACTCAAGCCTTGGCCGAACTGATGACTCGGTTGTTTCTGAAGATCGACTTAATGAAACTGAACATGACAGATTTAGAAGGCCAACAGAAATCCCTCTCAAAAAATACCTTTGTA  
 TAGAAGAGGAGAAAATCATAGACATTTCCACAGTGAATGATTTACATACCACTCATGAGCATGATCTCCATGCTGCTGCACATAAACCCACCGGCGAGAACAAAATGCTGTGAGGAAGCAATAATACCACTGGCACCACAAAGCTTCTCATCTT  
 CCCATGGCCCTGCTACTTGGATCCGATCGAAAAGAACAGGAATAGCTAATATAGCCGATGGTATCATGGGGATGGCATCCACAACTTCAAGTATGGGCTCGCAATTTGGTGCAGCTTTCAGTGTGGTGGTACAGGAGGAATCAGTACT  
 TCTATGCCGCTTCTGTCACTGAACCTGCCACATGAATAGGAGATTTTGCAGTCTTCTTAAAGCAGGATGACTATAAAGCAAGCAATGTATACAACCTCCTCTGCCATGATGGCTTACATAGGCCATAGGCCAGACCTGTGGTCACT  
 ATGCCAATAACATCACACTTTGGATCTTGGCTGCTGACGCTGACGAGCCTTGGCTCTATAGCCCTGGTGGATGCTTCCAGAAATGTTGATGGTGTGGTGAACAATGAAGAATCGGCTTTGCTGTGGGGCAATTCCTCTCAGAAATTTAGG  
 ATTGCTTTTGGATTTGCCATTTAGCTGGTGAATGGCCCTTATGAAGATAAAATTTGTTTGGACATCCAGTTTAACTAGAGTATCCCTCGAGGGGCCAAGCTTACCGCTACCCAGCTTTCTGTGCAAAAGTGGTCCCTATAGTGAAGTATGAT  
 TAAGTAGGCCACTGGCCGCTGTTTACAACCTGCTGACTGGGAAAGCTGACTGCTGGGATCTTTTGAAGGAACCTACTTCTGTGGTGGTGAACAATCACTACAGAGATTTAAAGCTCAAGGTAATAATAAAATTTTAAAGTGA  
 TAAATGTTAAACTAGCTGTGATTTGCTGGCTGGAGATTTGGCTTACTGAGTATGATTTATGAAAATTTATACACAGGAGCTAGTGATTTCTAATTTGTTGTTGTTATTTAGATTACAGACTCCCAAGGCTCAATTCAGGCCCTCAGCTCTCAGCT  
 CTGTTGATGATCAATAACAGCATTACCCATTTGTAGAGGTTTACTTGGCTTAAAAAACCTCCACACCTCCCCCTGAACCTGAACATAAAAATGAATGCAATTTGTTGTTAACTTTTATGGAGCTTATAATGGTTTACAATAAAGCAATAGC  
 ATCACAAATTTACAAAATAAGCATTTTTTCACGTGTTTGGTTGTTTGGTCCAACTCAATGATCTTATCTTGTGATCGATCTCCTGATTAAGCTCCTGATTAATGAATCGGCCAAGCGCGGGAGAGCGGTTTGGCTGGTGGCTAATAGC  
 GAAGAGGCCCGCCAGCTAGCCCTCCCAACAGTTGGCCAGCCTGAAATGGCGAATGGGAGCGGCCCTGAGCGGCGCATTAGCGCCGCGGGTGTGGTGGTTACGCGCAGCGGTGAGCCCTACACTTGCCAGCCCTAGCGCCCGCTCTT  
 TCGCTTTCCCTTCCCTTCTCGCCACGTTTGGCCGCTTCCCGCTCAAGCTCAAACTGGGGGCTCCCTTAAAGTTCGATTTAGTGGCTTACGGCACCTCGAACCCAAAACCTTGAATAGGCTGATGGCTTACCGCCATCGGCCATCGCC  
 TGATAGACGTTTTTGGCCTTTGACGTTGGAGTCAAGTCTTTTAAATAGTGGACTCTGTTTCCAAACTGSAACAACACTCAACCTATCTCGCTCTATTCTTTGATTTATAAGGCAATTTTGGCAATTTGGCAATTTGGCCTATTGGCCTATTG  
 TTAACAAAATTTAACGCGAATTTTAAACAAAATTAACGTTTCAAAATTTGGAGCTTTTGGGAAATTTGGCGGAAACCCCTATTGTTTATTTTCTAAATACATTAATATGTTTCCCTCATGCGAGCTTGGACTTGGAGAAAGG  
 CTGGCTCGCAGACTCGATGTGTACTGGAGGAAATAAAGGCTAAGATGTGGACTGAGGAAAGTCCGATGAAATTTAGTGGCTGTGAGGATCGCTGTATCAAAATGTGTGCCACCCTGGCATGAGACATAAACCTGATAAAGCTT  
 CAATAATATGAAAAGAAAGAGTATGATTTCAACATTTCCGCTGCGCCCTTATCCCTTTTTGGGGCTTTTGGCTTCTGTTTTTGGCTCACCCAGAAACCTGTGAAAGTAAAGATGCTGAAGATCAGTTGGTGCACCGAGTGGGTTTACA  
 TCGAACTGGATCTCAACAGCGTAAAGTCTTGGAGTGTGTTGCCCGAAGACGTTTCCAAATGATGAGCAGCTTTAAAGTTCGCTATGTCGCTTACGGCCGGGAGAACCACTCGTTCGCGCATACACTTCT  
 CAGAACTGTTGGTGTGATGACTCACAGTACAGAAAGCATTTACAGGATGGCATGACAGTAAGAAATATGCAAGTGTGCCATTAACCATGATGATTAACACTGCGGCCAACCTTCTGCAACAGCTGGGAGCCGAGGAGCTTAAGCC  
 TTTTGGTCCACAACTTGGTCCCTTGAATGAGCCTGATCGTTGGAAACCGAGGATGAATGAAGCATAACCAAAAGCAGCGCTGACACCCAGCTGCTGTAGCAATGGCAACAGCTTGGCCAACTTAACTGGCGAACTTACTCTTATG  
 CTCCCGGCAACAAATTAAGTGGAGGCGGATAAAGTGTGACAGGACCACTTCTGCTCGGCCCTTCCGCTGGCTGTTTATTGCTGATAAATCTGGAGCCGGTGAAGCGTGGTCTCGGCTCATATTGAGCAGCTGGGGCCAGATG  
 GTAAGCCCTCCCGTATCGATGTTATCTACAGCAGCGGGAGTCAAGCAACTATGGATGAAGCAAAATAGACAGTACGAGTGGCTTAAAGTTCGCTATGATGAGTAAAGCTTGGTAACTGTACAGCAAGTTTACTCATATATTTAGTTGATTTAAAC  
 TCATTTTAAATTTAAAGGATCTAGGTGAAGTCTTTTGTAAATCTGATGCCATAACTTCTGATAATGATGCTATACGAAATGATGCTATACGAAATGATGGCATGACCAAAATCCCTTAAACGTGATTTTTCGTTCCACTGAGCGTCAAGCCCGT  
 GATCCTTTGATGATCCTTTTTCTGGCGTAACTGCTGCTTGAACAACAAAACCCAGCTACACAGCGGTGGTTTGTGTTCCGATGATCAAGAGCTTAAAGCTTCTTTCCGAAGGTAACGTGGCTTCCAGCAGGCGCAGATACCAAACTACTCT  
 TCTAGTTAGCCGTAGTTAGGCCACCTTCAAGAACTCTGTAGCACCGCTCATACCTGCTGCTGATCTGATCTGTTTACCAGTGGCTGCTGCAAGTGGCGATAAAGTGTGCTTACCGGGTTGACTCAAGCAGTATGATACCAGGATAAGCGCG  
 AGCGGTCCGGCTGAACGGGGGTTGCTGACACACAGCCAGCTTGGAGCGAACGACCTACCCCAACTGAGATACCTACAGCGTGAGACTTGAAGAAAGCGCCACGCTTCCGAAAGGAGAAAGGCGGAGCAGGATTCGCGTAAAGCGGAGG  
 CGGAAACAGGAGAGCGCAGAGGAGCTTCCAGGGGAAACCGCTGGTATCTTTATGCTGCTGCGGGTTTGGCCACCTGACTGAGCGTGAATTTTGTGATGCTGCTGAGGGGGGGAGCCTTGAAAAACCGCAACCGCGCCCT  
 TTTACGTTTTCCGGCTTTTGGTGGCTTTTGGCTACATGTTCTTCCGCTTACCCCTGATCTGTTGGATAACCGTATACCAGCTTGAAGTGAAGTGAACCGCTGCGCCAGCCGCAACCGAGCCAGCGAGTCAAGTGAAGCGAGGAAAG  
 CGGAAAGAGCGCCAAATACGCAAAACCGCCTTCCCGCGCGTGGCCGATTCATTAATGCAAGATTCGAAATTCGCGGTTTTTCAATATTTAGAAGCTTATACAGGTTATTGCTCATGAGCGGTACATATTTGAATGATTTAGAATAAA  
 ACAAAATAGGGTTCCCGGCACATTTCCCGAAAAGTCCACCTGACGCTCTAAGAAACATTTATCATGACATTTAACCTATAAAAATAGGCGTAGTACGAGGCCCTTCACTCATTTAGTGCATGT
